# Supplementary material for: Education for Sustainable Development (ESD) in Romanian Higher Education Institutions (HEIs) within the SDGs Framework
Source: MDPI journal article supplement (doi:10.3390/ijerph19041998), 2022-02-11
Supplement: s1 [file s1]

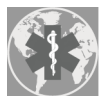

## Supplementary

### *Interview Script*

Date \_\_\_\_\_

Taking into consideration the definition of UNESCO on ESD, please answer the questions below as accurate as possible.  
Thank you kindly.

According to UNESCO, “Education for Sustainable Development develops and strengthens the capacity of individuals, groups, communities, organizations and countries to make judgements and choices in favour of sustainable development. It can promote a shift in people’s mind-sets and in so doing enable them to make our world safer, healthier and more prosperous, thereby improving the quality of life. Education for sustainable development can provide critical reflection and greater awareness and empowerment so that new visions and concepts can be explored, and new methods and tools developed” (Unesco, 2005, p. 1).

1. Please specify your position within the HEI \_\_\_\_\_

### General ESD aspects

2. Does your HEI ever signed any Declaration, Charter or Initiative connected to ES or ESD?

Yes

No

I don’t know/ I don’t want to answer

If yes, which Declaration, Charter or Initiative?

---

3. Did your HEI adopt ESD in their policies?

Yes

No

I don’t know/ I don’t want to answer

If yes, please offer some details.

---

---

4. Did your HEI adopt ESD in their mission/ vision/ goals/objectives?

Yes

No

I don’t know/ I don’t want to answer

If yes, please offer some details.

---

---

5. Did your HEI adopt ESD in their organization (departments/offices)?

Yes

No

I don't know/ I don't want to answer

If yes, please offer some details.

---

---

6. Did/does your HEI have a Strategic Plan for ESD?

Yes

No

I don't know/ I don't want to answer

If yes, please offer some details.

---

---

7. Are there staff members dedicated for ESD?

Yes

No

I don't know/ I don't want to answer

If yes, please offer some details.

---

---

8. Does your HEI have a dedicated ESD department?

Yes

No

I don't know/ I don't want to answer

If yes, please offer some details.

---

---

9. Do your HEI leaders support ESD by providing funds or other type of support?

Yes

No

I don't know/ I don't want to answer

If yes, please offer some details.

---

---

**Campus operations**

---

10. Digitalisation

Yes

No

I don't know/ I don't want to answer

If yes, please offer some details.

---

---

11. Waste reduction

Yes

No

I don't know/ I don't want to answer

If yes, please offer some details.

---

---

12. Access and facilities for disabled people

Yes

No

I don't know/ I don't want to answer

If yes, please offer some details.

---

---

13. Waste bins for separation

Yes

No

I don't know/ I don't want to answer

If yes, please offer some details.

---

---

14. Alternative energy

Yes

No

I don't know/ I don't want to answer

If yes, please offer some details.

---

---

15. Energy reduction

Yes

No

I don't know/ I don't want to answer

---

If yes, please offer some details.

---

16. Building operations

Yes

No

I don't know/ I don't want to answer

If yes, please offer some details.

---

17. Water management

Yes

No

I don't know/ I don't want to answer

If yes, please offer some details.

---

---

Please feel free to add any other Campus operations promoted by your HEI as far as SD is concerned.

---

**Education (sustainability incorporated curriculum/ pedagogy)**

18. Sustainability incorporated curriculum for all students

Yes

No

I don't know/ I don't want to answer

If yes, please offer some details.

---

19. Sustainability (optional) incorporated curriculum for all students

Yes

No

I don't know/ I don't want to answer

If yes, please offer some details.

---

20. SD major for Bachelor's level

Yes

No

I don't know/ I don't want to answer

If yes, please offer some details.

---

---

21. SD major for Master's level

Yes

No

I don't know/ I don't want to answer

If yes, please offer some details.

---

---

22. Role plays, simulation, discussions and debates on SD

Yes

No

I don't know/ I don't want to answer

If yes, please offer some details.

---

---

23. SD major for PhD's level

Yes

No

I don't know/ I don't want to answer

If yes, please offer some details.

---

---

24. SD training for lectures/professors on SD

Yes

No

I don't know/ I don't want to answer

If yes, please offer some details.

---

---

25. Multiple teaching-learning methodologies for teaching sustainability

Yes

No

I don't know/ I don't want to answer

If yes, please offer some details.

---

---

26. Possibility for students to take classes in other faculty (by modules)

Yes

No

I don't know/ I don't want to answer

If yes, please offer some details.

---

---

27. Invited lectures/professors on SD

Yes

No

I don't know/ I don't want to answer

If yes, please offer some details.

---

---

28. SD internships

Yes

No

I don't know/ I don't want to answer

If yes, please offer some details.

---

---

Please feel free to add any other measures concerning Education (sustainability incorporated curriculum/ pedagogy) promoted by your HEI as far as SD is concerned.

---

---

## Research

29. Researchers' Platform

Yes

No

I don't know/ I don't want to answer

If yes, please offer some details.

---

---

30. Green Projects on SD

Yes

No

---

I don't know/ I don't want to answer

If yes, please offer some details.

---

---

31. Encourage and promote joint research

Yes

No

I don't know/ I don't want to answer

If yes, please offer some details.

---

---

32. Research Centre on SD

Yes

No

I don't know/ I don't want to answer

If yes, please offer some details.

---

---

33. Funding SD Research

Yes

No

I don't know/ I don't want to answer

If yes, please offer some details.

---

---

34. Use of research generated in SD teaching

Yes

No

I don't know/ I don't want to answer

If yes, please offer some details.

---

---

35. Publications on SD

Yes

No

I don't know/ I don't want to answer

If yes, please offer some details.

---

---

36. Patents in SD

Yes

No

I don't know/ I don't want to answer

If yes, please offer some details.

---

---

Please feel free to add any other measures concerning Research promoted by your HEI as far as SD is concerned.

---

---

### Community outreach and collaborations

#### 37. SD Exchange programmes

Yes

No

I don't know/ I don't want to answer

If yes, please offer some details.

---

---

#### 38. Joint SD degrees with other HEIs

Yes

No

I don't know/ I don't want to answer

If yes, please offer some details.

---

---

#### 39. Joint SD research with other HEIs

Yes

No

I don't know/ I don't want to answer

If yes, please offer some details.

---

---

#### 40. Collaboration in SD research projects

Yes

No

I don't know/ I don't want to answer

If yes, please offer some details.

---

---

#### 41. SD partnerships with other stakeholders



Yes

No

I don't know/ I don't want to answer

If yes, please offer some details.

---

---

42. Part of a UN Regional Centre of Expertise (RCE)

Yes

No

I don't know/ I don't want to answer

If yes, please offer some details.

---

---

43. Part of interdisciplinary SD expert networks

Yes

No

I don't know/ I don't want to answer

If yes, please offer some details.

---

---

44. Academic staff involved in voluntary advisory activities in SD

Yes

No

I don't know/ I don't want to answer

If yes, please offer some details.

---

---

45. SD events that are open to the public/community

Yes

No

I don't know/ I don't want to answer

If yes, please offer some details.

---

---

Please feel free to add any other measures concerning Community outreach and collaborations promoted by your HEI as far as SD is concerned.

---

---

**On-campus experience**

46. Involvement of students in SD activities

Yes

No

I don't know/ I don't want to answer

If yes, please offer some details.

47. Involvement of professors and researchers in SD activities

Yes

No

I don't know/ I don't want to answer

If yes, please offer some details.

Please feel free to add any other measures concerning On-campus experience promoted by your HEI as far as SD is concerned.

**Barriers against ESD adoption with Romanian HEIs**

48. Lack of awareness:

|                                                | Yes | No | I don't know/ I don't want to answer |
|------------------------------------------------|-----|----|--------------------------------------|
| Ignorance and misunderstandings of SD concept  |     |    |                                      |
| Lack of leadership support                     |     |    |                                      |
| Lack of policies for SD support                |     |    |                                      |
| Lack of responsibility towards SD              |     |    |                                      |
| SD perceived as unimportant for the curriculum |     |    |                                      |

49. Lack of resources:

|                                                         | Yes | No | I don't know/ I don't want to answer |
|---------------------------------------------------------|-----|----|--------------------------------------|
| Funding                                                 |     |    |                                      |
| Lack of staff and more experienced officers to adopt SD |     |    |                                      |
| Infrastructure                                          |     |    |                                      |
| Priorities                                              |     |    |                                      |
| Government policies                                     |     |    |                                      |

50. Structural deficiencies:

|                               | Yes | No | I don't know/ I don't want to answer |
|-------------------------------|-----|----|--------------------------------------|
| Curriculum not adapted for SD |     |    |                                      |

|                                                                   |  |  |  |
|-------------------------------------------------------------------|--|--|--|
| Lack of management support as well as infrastructure to ensure SD |  |  |  |
| Lack of communication (leaders / staff)                           |  |  |  |
| Conservative leadership                                           |  |  |  |
| Resistance to change                                              |  |  |  |
| Focus on short term goals                                         |  |  |  |

Please feel free to add any other Barriers against ESD adoption with Romanian HEIs.

---



---

| HEI code | Interview type | Interview date                  |
|----------|----------------|---------------------------------|
| HEI1     | Zoom           | 3 September 2021                |
| HEI2     | Zoom           | 10 September 2021               |
| HEI3     | Zoom           | 11 September 2021 (rescheduled) |
| HEI4     | Skype          | 17 September 2021               |
| HEI5     | Zoom           | 24 September 2021 (rescheduled) |
| HEI6     | Skype          | 30 September 2021               |
| HEI7     | Zoom           | 11 October 2021 (rescheduled)   |

Interview characteristics (code, date, type)

#### Positions of participants within the HEI

|      |                                          |
|------|------------------------------------------|
| HEI1 | Senior Researcher                        |
| HEI2 | Associate Professor                      |
| HEI3 | Senior Professor                         |
| HEI4 | Vice-Rector                              |
| HEI5 | Director of the Office of Sustainability |
| HEI6 | Technology Transfer Office, Director     |
| HEI7 | Professor                                |
